# Supplementary material
Source: Research Square preprint supplement (doi:10.21203/rs.3.rs-9931291/v1)
Supplement: Supplementary file 1 [file 3c96c552e57993d92cb37fc3.pdf]

# Supplementary Information for: MontageFL: Privacy-Preserving Federated Learning across Heterogeneous EEG Montages

Bahaa Masry<sup>1,\*</sup>, Anas Shahin<sup>2</sup>, and George Karraz<sup>3</sup>

<sup>1</sup>Faculty of Medicine, Damascus University, Damascus, Syria

<sup>2</sup>Faculty of Information Technology, Syrian Virtual University, Damascus, Syria

<sup>3</sup>Faculty of Information Technology Engineering, Damascus University, Damascus, Syria

\*mo.bahaa.nasry@gmail.com

## ABSTRACT

This document contains supplementary information for the main manuscript.

## S1. Definition of the 56 covariance features (Stream B)

Stream B summarizes the within-epoch channel covariance structure. For each 4-second epoch the signal is divided into 1-second windows with 50% overlap; within each window every channel is z-scored and a covariance matrix  $\Sigma$  is formed and shrinkage-regularized as  $\Sigma' = (1-\lambda)\Sigma + \lambda I$  with  $\lambda=0.10$ , which keeps  $\Sigma'$  full rank at any channel count. This yields a sequence of regularized covariance matrices per epoch. For each of the four regions, 14 features are computed from this sequence (Table 1), where the diagonal series for a region is the set of channel variances over windows and the off-diagonal series is the set of within-region channel pairs ( $a < b$ ) over windows. Total:  $14 \times 4$  regions = 56 features. Regions with at least two channels (all regions under both montages) yield defined off-diagonal statistics.

**Table 1.** The 14 covariance features computed per region ( $\times 4$  regions = 56). All quantities are computed on the shrinkage-regularized covariance sequence described above.

| #  | Feature                  | Definition                                                                       |
|----|--------------------------|----------------------------------------------------------------------------------|
| 1  | Diagonal mean            | Mean of channel variances across channels and windows                            |
| 2  | Diagonal SD              | Standard deviation of the diagonal series                                        |
| 3  | Diagonal median          | Median of the diagonal series                                                    |
| 4  | Diagonal IQR             | 75th – 25th percentile of the diagonal series                                    |
| 5  | Temporal instability     | Mean absolute first difference of the diagonal series across windows             |
| 6  | Off-diagonal mean        | Mean of within-region channel-pair covariances                                   |
| 7  | Off-diagonal SD          | Standard deviation of the within-region pair covariances                         |
| 8  | Off-diagonal  mean       | Mean absolute within-region pair covariance                                      |
| 9  | Off-diagonal instability | Mean absolute first difference of the pair series across windows                 |
| 10 | Cross-region  coupling   | Mean absolute covariance between region channels and all other channels          |
| 11 | Coupling ratio           | Within-region  mean  (feature 8) divided by cross-region  coupling  (feature 10) |
| 12 | Eigenvalue ratio         | $\lambda_1/\lambda_2$ of the region’s mean (over windows) covariance submatrix   |
| 13 | Diagonal kurtosis        | Fisher kurtosis of the diagonal series                                           |
| 14 | Diagonal maximum         | Maximum value of the diagonal series                                             |
